# Supplementary material for: P2Y4 Nucleotide Receptor in Neuronal Precursors Induces Glutamatergic Subtype Markers in Their Descendant Neurons
Source: PubMed Central journal article supplement — Stem Cell Reports. 2016 Mar 10;6(4):474–82. doi: 10.1016/j.stemcr.2016.02.007 (PMC4834041; doi:10.1016/j.stemcr.2016.02.007), 2016-03-10
Supplement: mmc2.pdf [file mmc2.pdf]

## P2Y4 Nucleotide Receptor in Neuronal Precursors Induces Glutamatergic Subtype Markers in Their Descendant Neurons

Youichi Uda,<sup>1</sup> Shuai Xu,<sup>1</sup> Takafumi Matsumura,<sup>1</sup> and Yoshinori Takei<sup>2,\*</sup>

<sup>1</sup>Department of Genomic Drug Discovery Science

<sup>2</sup>Department of Nanobio Drug Discovery Science

Graduate School of Pharmaceutical Science, Kyoto University, 46-29 Shimo-adachi-cho, Yoshida, Sakyo-ku, Kyoto 606-8501, Japan

\*Correspondence: [ytakei@pharm.kyoto-u.ac.jp](mailto:ytakei@pharm.kyoto-u.ac.jp)

<http://dx.doi.org/10.1016/j.stemcr.2016.02.007>

This is an open access article under the CC BY-NC-ND license (<http://creativecommons.org/licenses/by-nc-nd/4.0/>).

### SUMMARY

Neural stem cells (NSCs) produce all neuronal subtypes involved in the nervous system. The mechanism regulating their subtype selection is not fully understood. We found that the expression of the nucleotide receptor P2Y4 was transiently augmented in the course of neuronal differentiation of mouse embryonic stem cells (ESCs), which was after loss of pluripotency but prior to terminal differentiation of neurons. The activation of P2Y4 in the differentiating ESCs resulted in an increased proportion of neurons expressing vesicular glutamate transporter (vGluT), a marker of glutamatergic subtype. A subpopulation of type 2 NSCs of the adult mouse hippocampus expressed P2Y4. Its activation induced the expression of glutamatergic subtype markers, vGluT and TBR1, in their descendant neurons. Reciprocally, inhibition of the P2Y4 signaling abolished the effects of nucleotides on those expressions. Our results provide evidence that differentiating NSCs pass through a stage in which nucleotides can affect subtype marker expression of their descendant neurons.

### INTRODUCTION

The brain contains many different subtypes of neurons, such as dopaminergic, GABAergic, cholinergic, and glutamatergic neurons. All neurons are differentiated from neural stem cells (NSCs). The mechanism by which NSCs produce such variety of neuronal subtypes is not fully understood.

Glutamatergic neurons are the most abundant subtype in the mammalian brain (Fonnum, 1984). Production of this neuronal subtype can be observed not only in the development of the forebrain but also throughout life in the hippocampus of the adult brain (Gage, 2000). In the development, glutamatergic neurons are produced from neuroepithelial cells at the dorsal side of the anterior neural tube, but GABAergic neurons are produced at the ventral side (Danesin et al., 2009). For this patterning along the dorsoventral axis, Sonic hedgehog (SHH) and WNT are the determinant factors for ventral and dorsal characters of cells, respectively. The canonical WNT signaling through  $\beta$ -catenin induces expression of a transcription factor, PAX6 (Gan et al., 2014), activating the cascade of transcription factors including TBR1 and TBR2 for glutamatergic neuronal differentiation (Backman et al., 2005; Hevner et al., 2006; Machon et al., 2007).

In the adult hippocampus, stem cells located at the subgranular zone (SGZ) can produce neurons throughout life (Ming and Song, 2005). Radial glial cell-type NSCs expressing glial fibrillary acidic protein (GFAP) are called type 1 in the SGZ (Kempermann et al., 2004). Type 1 NSCs develop into post-mitotic neurons through three

consecutive stages of progenitor cells, namely types 2a, 2b, and 3. The majority of newborn neurons in the SGZ matures into glutamatergic granule neurons in the hippocampus. The signaling pathways triggering glutamatergic subtype selection in the adult hippocampus are not fully understood.

Many studies have provided evidence that signaling initiated from extracellular nucleotides plays important roles in the regulation of neurogenesis not only during embryonic development of the brain but also in the adult brain (Neary and Zimmermann, 2009; Zimmermann, 2011). Extracellular nucleotides can activate ionotropic receptors (P2X1-7) and G-protein-coupled receptors (P2Y1, 2, 4, 6, 8, 11–14) (Erb et al., 2006). While all P2X receptors are activated by ATP, the agonist specificity of P2Y receptors is dependent upon their subtype (von Kugelgen, 2006). For instance, P2Y1 is activated by both ATP and ADP but not uridine triphosphate (UTP), whereas P2Y2 is activated by both ATP and UTP but not ADP. In vitro experiments indicated that ATP and/or UTP can stimulate proliferation and survival of NSCs (Mishra et al., 2006; Lin et al., 2007; Milosevic et al., 2006). In vivo, ATP secreted from astrocytes regulates proliferation of NSCs in the adult hippocampus (Cao et al., 2013). These reports indicate that extracellular nucleotides can control proliferation of NSCs. However, the effects of extracellular nucleotides on selection of neuronal subtypes have not been elucidated. In the present study, we found that extracellular nucleotides can induce glutamatergic subtype neuronal markers through the activation of P2Y4 nucleotide receptor.

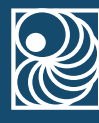

## RESULTS

### ATP Induces Expression of Vesicular Glutamate Transporter

The differentiation of mouse embryonic stem cells (ESCs) was induced by depletion of fibroblast growth factor 2 (FGF2) and epidermal growth factor (EGF), either with or without ATP addition. Neurons expressing a glutamatergic subtype marker vesicular glutamate transporter (vGluT) were observed abundantly in the neurons differentiated in the presence of added ATP (Figures 1A and S1). Without ATP addition, the majority of differentiated neuronal cells expressed vesicular  $\gamma$ -aminobutyric acid (GABA) transporter (vGAT), a marker of GABAergic neurons. Neither expression of a dopaminergic subtype marker tyrosine hydroxylase nor of a cholinergic subtype marker vesicular acetylcholine transporter was detectable under these conditions. The addition of ATP had no detectable effects on the expression of a neuronal marker tubulin- $\beta$ III (Figures 1B and 1C). Compared with the cells differentiated in the absence of ATP addition, expression of vGAT and vGluT in cells differentiated in the presence of ATP addition was 2-fold lower and higher, respectively (Figure 1D). Thus, ATP induces expression of a glutamatergic subtype marker vGluT.

### Nucleotide Specificity of vGluT Induction

To examine which receptor mediates the ATP-induced vGluT expression, we added nucleotides separately to the medium of differentiating ESCs. ATP can activate P2Xs and P2Ys; however, UTP can activate only P2Y2 and P2Y4 (von Kugelgen, 2006). The added triphosphate form of nucleotides can be digested into di- or monophosphate form in the culture medium, and uridine diphosphate (UDP) is a specific agonist of P2Y6 (von Kugelgen, 2006). Both ATP and UTP, but not UDP, induced expression of vGluT in neurons differentiated from mouse ESCs (Figures 2A and 2B). This suggests that P2Y2 and/or P2Y4 are involved in the induction of vGluT expression (Figure S2).

Figure 2C shows expression of P2Y2 and P2Y4 in the differentiation of ESCs. While P2Y2 expression was not changed during the differentiation, P2Y4 expression was transiently increased (Figures 2C and 2D). P2Y4 expression peaked on day 4 of differentiation, and the expression level on day 8 of differentiation was similar to that on day 0. Expression of a pluripotent marker, Oct4, was suddenly decreased after the induction of differentiation, and was almost absent by day 4 of differentiation (Figure 2E). Expression of an immature neuron marker, tubulin- $\beta$ III, was obvious from day 6 of differentiation. These results suggest that expression of P2Y4 is increased transiently during differentiation, and that its peak occurs after loss of pluripotency but before the terminal differentiation of neurons.

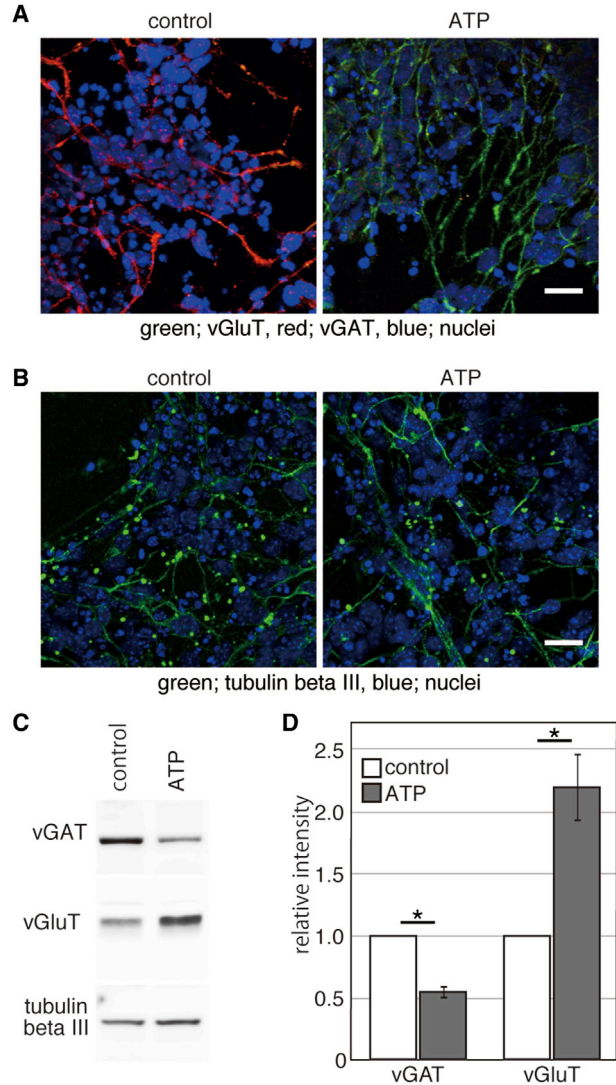

**Figure 1. Effects of ATP Treatment on the Differentiation of Mouse ESCs**

(A and B) On day 14 of differentiation, cells were fixed and expression of the indicated proteins was examined. Scale bar indicates 25  $\mu$ m.

(C) Cell extracts were prepared from cells on day 14 of differentiation. Twenty micrograms of protein was analyzed and expression of the indicated proteins was examined.

(D) The intensities of signals in (C) were assessed with ImageJ version 1.45n. The graph shows the mean of three independent experiments and the error bars indicate SE. The intensities of bands in control cells were set at 1. \* $p < 0.05$  (Student's  $t$  test).

See also Figure S1.

To examine when extracellular nucleotides can induce vGluT expression, we added ATP to the medium of differentiating mouse ESCs from day 0, 3, 5, or 7 of differentiation. Treatment with ATP from day 0, day 3, and day 5 increased expression of vGluT in the descendant neurons (Figures 2F

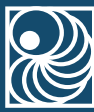

and 2G). Induction of vGluT expression was almost absent when the cells were treated with ATP from day 7 of differentiation. Treatment with ATP from days 3 to 7 of differentiation was sufficient to induce vGluT expression in the descendant neurons. When ATP was not added, ESCs differentiated into neurons expressing vGAT (Figure 2F, control). These results indicate that the window of nucleotide-mediated vGluT expression is from day 3 to day 7 of the neuronal differentiation of ESCs, which is coincident with the increased P2Y4 expression.

### Expression of P2Y4 in Hippocampus NSCs

To examine P2Y4 expression in NSCs further, we used NSCs prepared from the postnatal mouse hippocampus. NSCs in the hippocampus are classified into four types, types 1, 2a, 2b, and 3, by their profiles of protein expression. One of five NSC clones derived from the hippocampus (clone d) showed higher expression of P2Y4 than the others (Figure 3A). Cells expressing GFAP, a marker of type 1 NSCs, were abundant in the clone c NSCs but not in the clone d NSCs (Figure 3B). SRY-related HMG-box gene 2 (SOX2) is a stem cell marker expressed mainly in types 1 and 2 NSCs (von Bohlen und Halbach, 2011). Expression of SOX2 was detected in almost all cells derived from the adult mouse hippocampus (Figure 3B). Cells in the clones a, b, and e also show expression of GFAP and SOX2 similar to that of the clone c. These results suggest that NSCs derived from the hippocampus are types 1 and 2, and that the difference in P2Y4 expression among those NSC clones could be due to cell types of NSCs.

Less than approximately 10% of GFAP-positive cells expressed P2Y4 in clone d NSCs (Figures 3C and 3D). Nestin is expressed in types 1 and 2 NSCs (Kempermann et al., 2004; von Bohlen und Halbach, 2011). Approximately 60% of nestin-positive cells expressed P2Y4. P2Y4 was frequently co-expressed with doublecortin, a marker of type 2b NSCs (Kempermann et al., 2004; von Bohlen und Halbach, 2011).

Figure 3E shows the expression of P2Y4 in the sections prepared from adult mouse hippocampus. P2Y4-Positive cells were observed sparsely in the SGZ of the adult mouse hippocampus. Expression of either nestin or doublecortin, but not GFAP, was frequently observed in the P2Y4-positive cells (Figures 3E and 3F). These results suggest that P2Y4 is expressed in type 2 NSCs of the adult hippocampus.

### Signaling from P2Y4 Induces Expression of Glutamatergic Neuronal Markers

Although NSCs in the hippocampus produce glutamatergic neurons in vivo, neurons differentiated from the NSCs in vitro were mainly vGAT positive (Figure 4A, control). The addition of UTP, a P2Y4 agonist, promoted production of neurons expressing vGluT (Figure 4A, UTP). The

glutamatergic neuron-specific transcription factor TBR1 exhibited nuclear location when differentiation was induced in the presence of added UTP (Figures 4B and 4C). These results suggest that production of glutamatergic neurons is not intrinsic to hippocampus NSCs, but appears to be dependent upon the microenvironment around the differentiating NSCs in the hippocampus. Moreover, these results indicate that UTP can promote expression of glutamatergic neuronal markers in newborn neurons differentiated from NSCs derived from the hippocampus.

To assess the effects of P2Y4 depletion on the expression of glutamatergic subtype markers, we transfected small interfering RNAs (siRNAs) into the clone d cells. Transfection of siRNAs against P2Y4 and Gq- $\alpha$  decreased the expression levels of those target proteins, respectively (Figures 4D and 4E), and the siRNAs inhibited UTP-dependent induction of glutamatergic neurons (Figures 4F and 4G). These results indicate that the P2Y4-Gq signaling axis has a crucial role in nucleotide-dependent induction of the glutamatergic neuronal markers.

## DISCUSSION

The neuronal network in the brain is constructed of many different subtypes of neurons; however, the mechanism by which NSCs produce a variety of neuronal subtypes is not fully understood. In this study, we show that UTP treatment of differentiating NSCs derived from the postnatal mouse hippocampus induced expression of glutamatergic neuron markers, vGluT and TBR1, in their descendant neurons. Nucleotide-induced vGluT expression was also observed in the neuronal differentiation of mouse ESCs. Uracil nucleotides, both UTP and UDP, have been reported to promote dopaminergic differentiation of NSCs derived from the human fetal midbrain (Milosevic et al., 2006). Delic and Zimmermann (2010) showed that 2CIATP, but not uracil nucleotides, promotes dopaminergic differentiation of NSCs derived from the ventral mesencephalon of embryonic day 10.5 (E10.5) and E13.5 mice. Nucleotide receptors corresponding to this induction of dopaminergic neurons have not been identified. Taking these reports and the present study together, the effects of extracellular nucleotides appear to be variable and are perhaps dependent upon region and developmental stage of tissues used for NSC preparation.

The present study indicated that induction of glutamatergic markers by nucleotides involved the P2Y4-Gq signaling axis. Expression of the P2Y4 nucleotide receptor was transiently augmented in the course of neuronal differentiation of ESCs, which is coincident with the window of nucleotide-induced vGluT expression. P2Y4 expression was observed in type 2 NSCs of the adult mouse

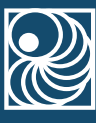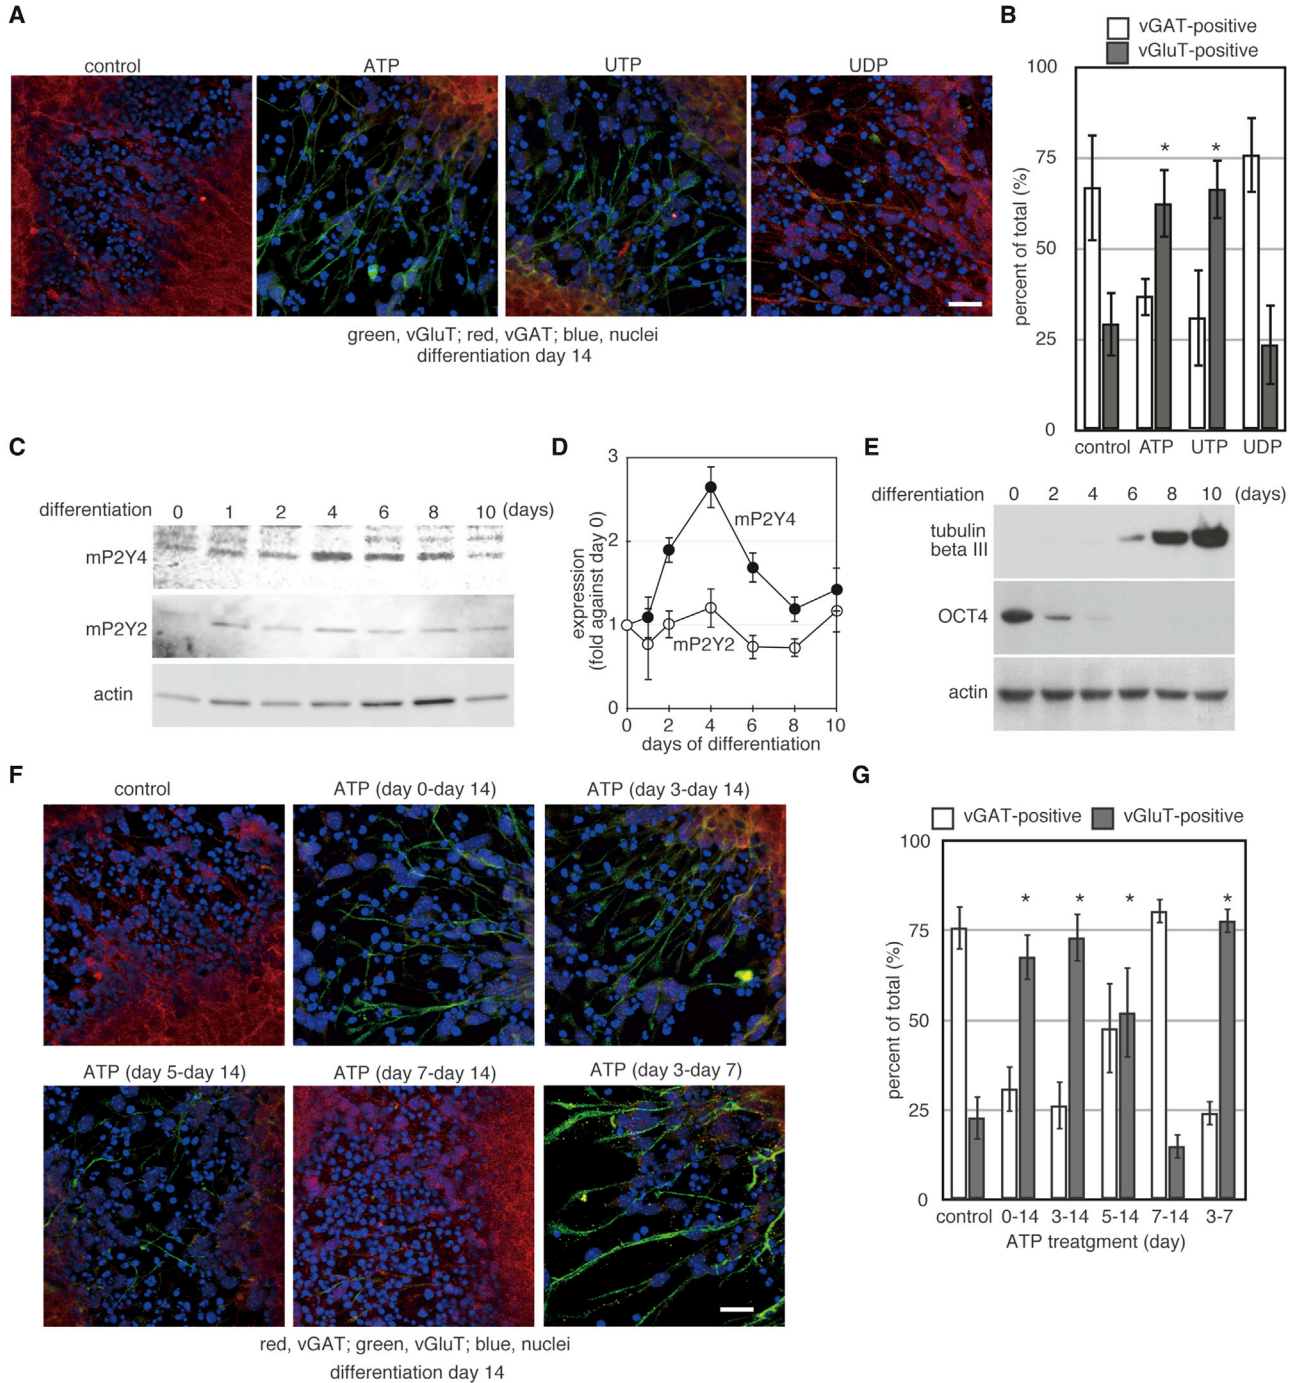

### Figure 2. Window of Nucleotide-Induced vGluT Expression

(A) Differentiation of mouse ESCs was induced for 14 days on gelatin in the presence of 20  $\mu$ M of the indicated nucleotides. Scale bar indicates 25  $\mu$ m.

(B) Cells positive for vGAT or vGluT in (A) were quantified as described in [Experimental Procedures](#). The graph shows the mean of six independent experiments and the error bars indicate SE. \* $p < 0.05$  relative to control (Student's t test).

(C and E) Extracts were prepared from cells on the indicated differentiation days, and samples (20  $\mu$ g of proteins) were analyzed by SDS-PAGE.

(D) Intensities of signals in (C) were assessed with ImageJ version 1.45n. The graph shows the mean of three independent experiments and the error bars indicate SE.

(legend continued on next page)



hippocampus, mainly in type 2b. In vitro experiments indicated that activation of the P2Y4 expressed in the type 2 NSCs was sufficient for induction of glutamatergic markers in their descendant neurons. Since the decision regarding neuronal cell fate is thought to occur in the early stage of type 2 NSCs (Kempermann et al., 2004), the differentiation stage sensitive to the nucleotide-induced glutamatergic subtype selection appears to follow the decision of the neuronal lineage, but precedes terminal differentiation of neurons. Thus far, some in vitro methods for induction of glutamatergic neuron subtype have been reported (Reyes et al., 2008; Gaspard et al., 2008; Shi et al., 2012); however, it remains uncertain which stage of differentiating NSCs is sensitive to these induction methods. The present study indicated a differentiation stage in which expression of neuronal subtype markers can be affected by extracellular nucleotides.

In summary, this study demonstrated that differentiating NSCs transiently expressed a nucleotide receptor P2Y4. P2Y4 was co-expressed with type 2 NSC markers, doublecortin and nestin, in the SGZ of adult mouse hippocampus. Activation of P2Y4 in NSCs resulted in expression of glutamatergic neuronal markers in descendant neurons. Taken together, these results suggest that NSCs differentiating into neurons pass through a stage in which nucleotides can affect the expression of subtype markers of descendant neurons.

## EXPERIMENTAL PROCEDURES

### Antibodies

Anti-mouse P2Y4 (ab180718), anti-nestin (ab134017), anti-doublecortin (ab135349), and anti-TBR1 (ab31904) antibodies were purchased from Abcam. Anti-tubulin  $\beta$  III antibody (T5076) was purchased from Sigma. Anti-vGAT antibody (131003) was purchased from Synaptic Systems. Anti-P2Y2 antibody (PA1-4517) was purchased from Thermo. Anti-OCT4 antibody (611203) was purchased from BD Bioscience. Anti-mouse vGluT (MAB5502), anti-GFAP (AB5541), anti-SOX2 (AB5603), anti-Gq- $\alpha$  (06-709) antibodies were purchased from Millipore.

### Mouse ESC Culture and Differentiation Induction

The mouse ESC line CGR8 was maintained in ESGRO Complete Plus medium (Millipore) on gelatin-coated dishes. For induction of differentiation, the cells were seeded at a density of  $1 \times 10^4$  cells/cm<sup>2</sup> in RHB-A medium (Takara) on gelatin-coated ibidi micro-dishes (Ying et al., 2003). Half of the medium was changed every day. For treatment with nucleotides, RHB-A medium containing 20  $\mu$ M of the indicated nucleotide was used.

### Mouse Adult NSC Preparation, Culture, and Differentiation

All animals were handled and cared for in accordance with the Guide of Care and Use of Laboratory Animals approved by the Ethic Committee of Experimental Animals of Kyoto University. Mouse NSCs were prepared from the hippocampus of the postnatal day 5 Balb/c mouse. For preparation of single-cell suspensions from tissues, Nerve-Cells Dispersion Solution (Sumitomo Bakelite) was used. For isolation of NSCs, neurospheres were prepared using the NeuroCult NCFC Assay Kit (Stem Cell Technology). Neurospheres with a diameter of 1–2 mm were isolated after 3 weeks of incubation and dispersed with Accutase (Millipore) to prepare a single-cell suspension. This neurosphere formation process was repeated twice. For monolayer culture of NSCs, single-cell suspension was seeded on dishes coated with polyornithine and laminin in N2B27 medium containing 0.1  $\mu$ g/ml heparin, 20 ng/ml FGF2, and 20 ng/ml EGF.

For neuronal differentiation, cells were seeded on ibidi micro-dishes (35 mm) coated with polyornithine and laminin in N2B27 media containing 0.1  $\mu$ g/ml heparin, 20 ng/ml FGF2, and 20 ng/ml EGF. After incubation for 2 days, the medium was changed to N2B27 medium lacking heparin and the growth factors. Half of the medium was changed every day. For treatment with nucleotide, N2B27 medium containing 20  $\mu$ M of the indicated nucleotide was used.

### Immunofluorescence of Cells

Cells were fixed with 2% paraformaldehyde and immunofluorescence was performed as described previously (Takei, 2009) with the indicated antibodies. For quantification of vGluT-positive and vGAT-positive cells, differentiated cells were harvested using Accutase and seeded on poly-D-lysine-coated ibidi micro-dishes (35 mm) at a density of  $1 \times 10^6$  cells/dish. After attachment of cells, cells were fixed and incubated with anti-vGAT and anti-vGluT antibodies. Cells positive for vGAT or vGluT were counted manually. More than 200 cells were examined per sample and experiments were repeated three times. For quantification of neurons differentiated from NSCs derived from mouse hippocampus, differentiated cells were used directly for immunofluorescence and cells were manually counted, since their density was sufficiently low. More than 200 cells were examined per sample and experiments were repeated three times.

### Preparation of Brain Slices from Adult Mice and Immunofluorescence

All animals were handled and cared for in accordance with the Guide for the Care and Use of Laboratory Animals approved by the Ethics Committee of Experimental Animals of Kyoto University. Male C57BL/6 mice, 7 weeks old, under deep anesthesia with isoflurane were transcardially perfused with PBS followed by 4% paraformaldehyde (PFA) in PBS. Brains were removed and

(F) ATP was added to the medium of differentiating mouse ESCs at a final concentration of 20  $\mu$ M for the indicated days.

(G) Cells positive for vGAT or vGluT in (F) were quantified as described in [Experimental Procedures](#). The graph shows the mean of three independent experiments and the error bars indicate SE. \* $p < 0.05$  relative to control (Student's t test).

See also [Figure S2](#).

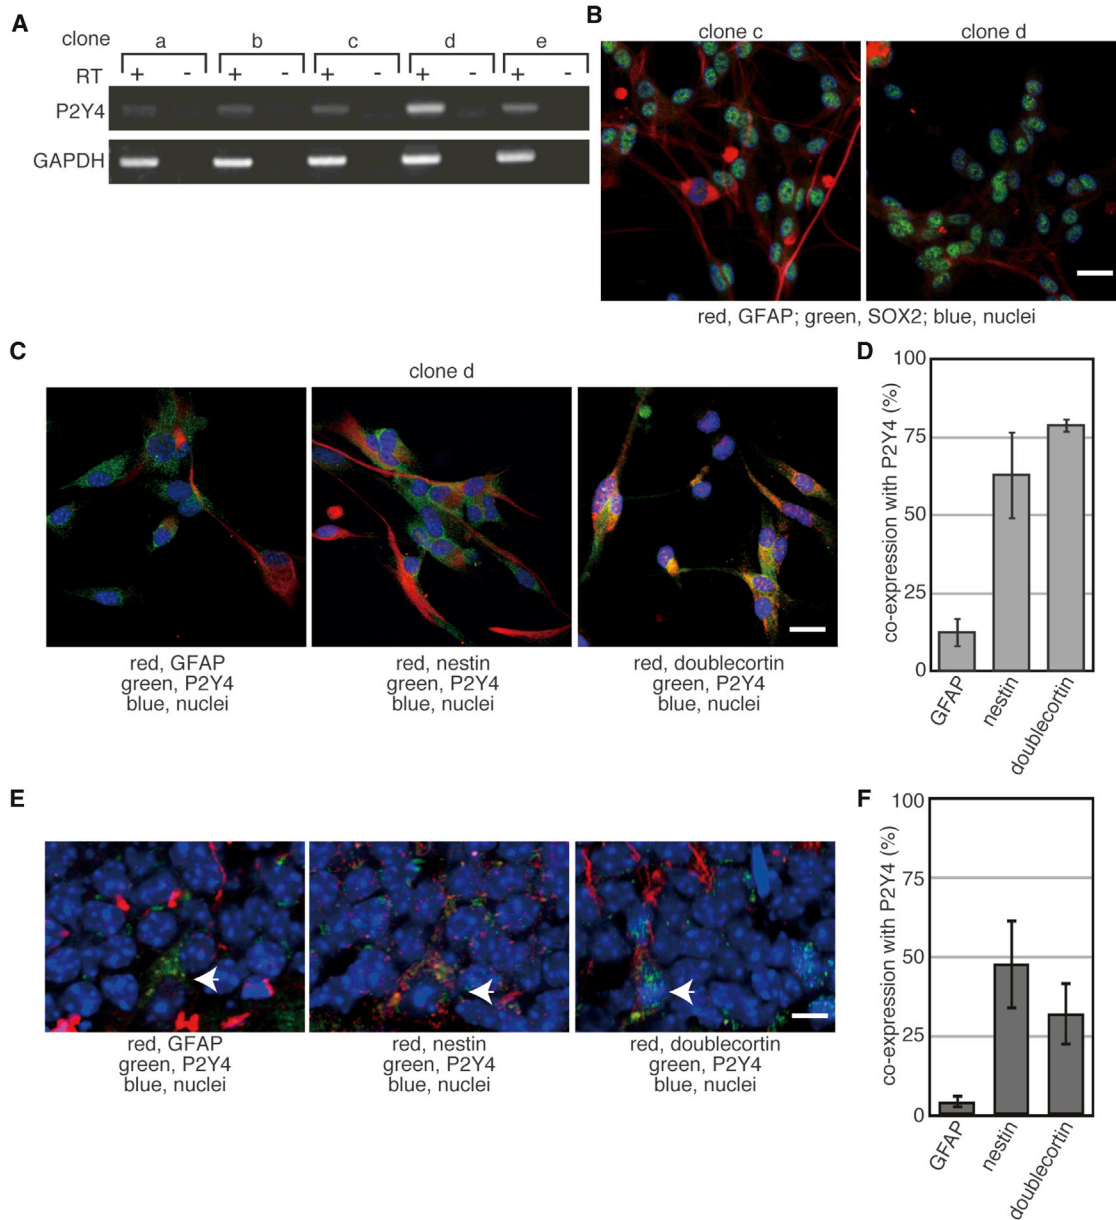

### Figure 3. Expression of the P2Y4 Nucleotide Receptor in the NSCs of the Hippocampus

(A) Total RNA was prepared from cultured NSCs derived from the hippocampus and was used for reverse transcription. As a negative control, samples without reverse transcriptase (RT) were also prepared. PCR was performed with the resulting cDNAs.

(B) Monolayer-cultured NSC clones c and d were fixed with 4% PFA and used for immunofluorescence to examine the expression of the indicated proteins. Scale bar indicates 25  $\mu$ m.

(C) Monolayer-cultured clone d NSCs were fixed and used for immunofluorescence to examine expression of the indicated proteins. Scale bar indicates 10  $\mu$ m.

(D) Cells co-expressing P2Y4 with the indicated proteins were counted. The graph shows the mean of three independent experiments and the error bars indicate SE.

(E) Coronal sections were prepared from frozen mouse brains and used for immunofluorescence with indicated antibodies. Arrowheads indicate P2Y4-positive cells. Scale bar indicates 7.5  $\mu$ m.

(F) Cells co-expressing P2Y4 and indicated proteins in (E) were quantified. The graph shows the mean of results from three mice and the error bars indicate SE.

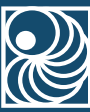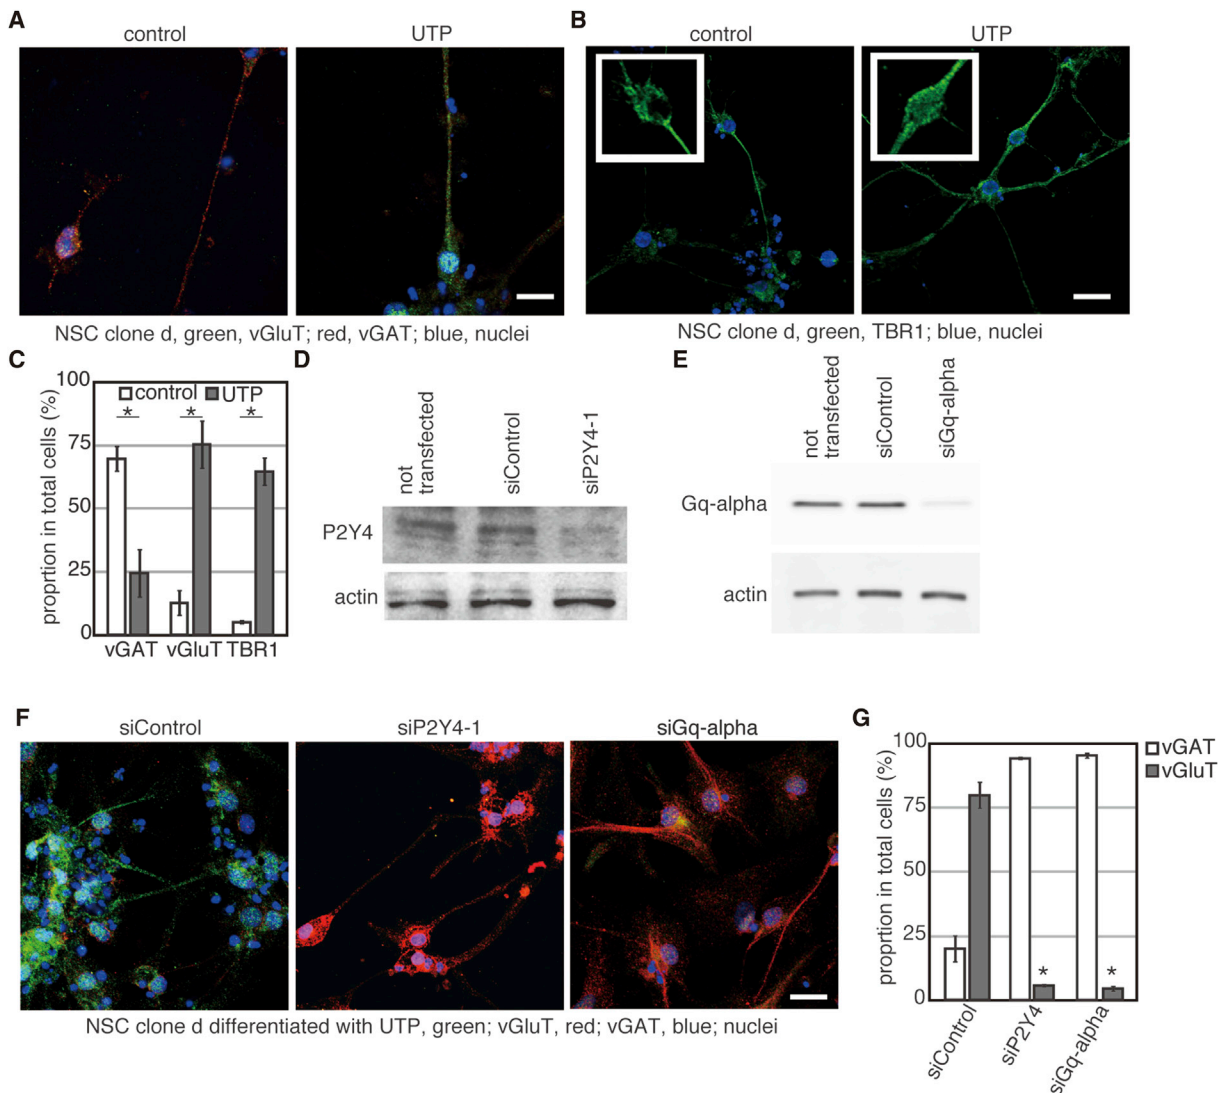

#### Figure 4. Nucleotide-Induced Glutamatergic Neuronal Markers in Neurons Differentiated from Hippocampus NSCs

(A and B) Differentiation of clone d NSCs was induced in the presence of 20  $\mu$ M UTP for 7 days. After fixation, cells were used for immunofluorescence. Scale bar indicates 25  $\mu$ m. The insets show higher-magnification images.

(C) Cells expressing the indicated protein in (A) and (B) were counted. The graph shows the mean of three independent experiments and the bars indicate SE. \* $p < 0.05$  (Student's *t* test).

(D and E) Monolayer-cultured clone d NSCs were transfected with the indicated siRNAs. Three days after transfection, cells were harvested and cell extracts were prepared. Twenty micrograms of protein was analyzed. Staining with anti-actin antibody is shown as an internal standard.

(F) Differentiation of monolayer-cultured clone d NSCs was induced with or without added UTP, after transfection of the indicated siRNAs. Cells were fixed on day 7 of differentiation, and used for immunofluorescence.

(G) Cells expressing vGAT or vGluT in (F) were quantified. The graph shows the mean of three independent experiments and the bars indicate SE. \* $p < 0.05$  relative to control (Student's *t* test).

kept overnight in 4% PFA in PBS at 4°C, cryoprotected in 20% sucrose in PBS, and embedded in Optimal Cutting Temperature compound (Leica). Tissue cryosections (10  $\mu$ m thickness) were then permeabilized with 0.05% Tween 20 in PBS, blocked with Blocking One Hist (Nakarai, Japan) for 30 min, and incubated overnight at 4°C with indicated antibodies. In Figure 3F, 25–30 P2Y4-positive

cells were examined for each animal, and cells co-expressing indicated proteins were quantified.

#### Preparation of Cell Extracts and Western Blotting

Cells were harvested and washed once with PBS. Cell pellets were resuspended in a 4-fold volume of 20 mM Tris-HCl (pH 8.0),



150 mM NaCl, 0.5% Triton X-100, and protease inhibitor mix (Roche), and incubated for 15 min on ice. After centrifugation at  $12,000 \times g$  for 15 min at 4°C, supernatants were analyzed by SDS-PAGE and transferred to polyvinylidene fluoride membranes.

### Transfection of siRNA

NeuroMag (OZ Bioscience) was used to introduce siRNAs into NSCs according to the manufacturer's recommendations.

### RT-PCR

Total RNA was prepared from cultured NSCs using Isogen reagent and Direct-Zol (Zymogen), and used for cDNA synthesis with Superscript II (Invitrogen). cDNA prepared from 250 ng of RNA was used as the template for PCR. The sequence of the forward primer for mouse P2Y4 was AGACGGGCGCTGATGTGTATC and the reverse was AGGTTTCACATGCCCTGTACC.

### SUPPLEMENTAL INFORMATION

Supplemental Information includes Supplemental Experimental Procedures and two figures and can be found with this article online at <http://dx.doi.org/10.1016/j.stemcr.2016.02.007>.

### AUTHOR CONTRIBUTIONS

Y.T. conceived the project; Y.T. and Y.U. designed the experiments and wrote the manuscript; Y.U., S.X., T.M., and Y.T. performed the experiments and analyzed the data; and all authors discussed the results and commented on the manuscript.

### ACKNOWLEDGMENTS

This work was supported by the Grant-In Aid for Scientific Research (C) (JSPS KAKENHI number 23500392) from the Japan Society for the Promotion of Science, and by the Seamless Technology Transfer Program through Target-Driven R&D (AS232Z00373F) of the Japan Science and Technology Agency. This work was also partially supported by the Shimizu Foundation for Immunology and Neuroscience.

Received: July 23, 2015

Revised: February 11, 2016

Accepted: February 11, 2016

Published: March 10, 2016

### REFERENCES

Backman, M., Machon, O., Mygland, L., van den Bout, C.J., Zhong, W., Taketo, M.M., and Krauss, S. (2005). Effects of canonical Wnt signaling on dorso-ventral specification of the mouse telencephalon. *Dev. Biol.* 279, 155–168.

Cao, X., Li, L.P., Qin, X.H., Li, S.J., Zhang, M., Wang, Q., Hu, H.H., Fang, Y.Y., Gao, Y.B., Li, X.W., et al. (2013). Astrocytic adenosine 5'-triphosphate release regulates the proliferation of neural stem cells in the adult hippocampus. *Stem Cells* 31, 1633–1643.

Danesin, C., Peres, J.N., Johansson, M., and Snowden, V. (2009). Integration of telencephalic Wnt and hedgehog signaling center activities by Foxg1. *Dev. Cell* 16, 576–587.

Delic, J., and Zimmermann, H. (2010). Nucleotides affect neurogenesis and dopaminergic differentiation of mouse fetal midbrain-derived neural precursor cells. *Purinergic Signal.* 6, 417–428.

Erb, L., Liao, Z., Seye, C.I., and Weisman, G.A. (2006). P2 receptors: intracellular signaling. *Pflugers Arch.* 452, 552–562.

Fonnum, F. (1984). Glutamate: a neurotransmitter in mammalian brain. *J. Neurochem.* 42, 1–11.

Gage, F.H. (2000). Mammalian neural stem cells. *Science* 287, 1433–1438.

Gan, Q., Lee, A., Suzuki, R., Yamagami, T., Stokes, A., Nguyen, B.C., Pleasure, D., Wang, J., Chen, H.W., and Zhou, C.J. (2014). Pax6 mediates ss-catenin signaling for self-renewal and neurogenesis by neocortical radial glial stem cells. *Stem Cells* 32, 45–58.

Gaspard, N., Bouschet, T., Hourez, R., Dimidschstein, J., Naeije, G., van den Ameel, J., Espuny-Camacho, I., Herpoel, A., Passante, L., Schiffmann, S.N., et al. (2008). An intrinsic mechanism of corticogenesis from embryonic stem cells. *Nature* 455, 351–357.

Hevner, R.F., Hodge, R.D., Daza, R.A., and Englund, C. (2006). Transcription factors in glutamatergic neurogenesis: conserved programs in neocortex, cerebellum, and adult hippocampus. *Neurosci. Res.* 55, 223–233.

Kempermann, G., Jessberger, S., Steiner, B., and Kronenberg, G. (2004). Milestones of neuronal development in the adult hippocampus. *Trends Neurosci.* 27, 447–452.

Lin, J.H., Takano, T., Arcuino, G., Wang, X., Hu, F., Darzynkiewicz, Z., Nunes, M., Goldman, S.A., and Nedergaard, M. (2007). Purinergic signaling regulates neural progenitor cell expansion and neurogenesis. *Dev. Biol.* 302, 356–366.

Machon, O., Backman, M., Machonova, O., Kozmik, Z., Vacik, T., Andersen, L., and Krauss, S. (2007). A dynamic gradient of Wnt signaling controls initiation of neurogenesis in the mammalian cortex and cellular specification in the hippocampus. *Dev. Biol.* 311, 223–237.

Milosevic, J., Brandt, A., Roemuss, U., Arnold, A., Wegner, F., Schwarz, S.C., Storch, A., Zimmermann, H., and Schwarz, J. (2006). Uracil nucleotides stimulate human neural precursor cell proliferation and dopaminergic differentiation: involvement of MEK/ERK signalling. *J. Neurochem.* 99, 913–923.

Ming, G.L., and Song, H. (2005). Adult neurogenesis in the mammalian central nervous system. *Annu. Rev. Neurosci.* 28, 223–250.

Mishra, S.K., Braun, N., Shukla, V., Fullgrabe, M., Schomerus, C., Korf, H.W., Gachet, C., Ikehara, Y., Seigny, J., Robson, S.C., and Zimmermann, H. (2006). Extracellular nucleotide signaling in adult neural stem cells: synergism with growth factor-mediated cellular proliferation. *Development* 133, 675–684.

Neary, J.T., and Zimmermann, H. (2009). Trophic functions of nucleotides in the central nervous system. *Trends Neurosci.* 32, 189–198.

Reyes, J.H., O'Shea, K.S., Wys, N.L., Velkey, J.M., Prieskorn, D.M., Wesolowski, K., Miller, J.M., and Altschuler, R.A. (2008). Glutamatergic neuronal differentiation of mouse embryonic stem cells after transient expression of neurogenin 1 and treatment with BDNF and GDNF: in vitro and in vivo studies. *J. Neurosci.* 28, 12622–12631.



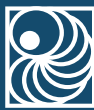

- Shi, Y., Kirwan, P., Smith, J., Robinson, H.P., and Livesey, F.J. (2012). Human cerebral cortex development from pluripotent stem cells to functional excitatory synapses. *Nat. Neurosci.* *15*, 477–486, S1.
- Takei, Y. (2009). Phosphorylation of Nogo receptors suppresses Nogo signaling, allowing neurite regeneration. *Sci. Signal* *2*, ra14.
- von Bohlen und Halbach, O. (2011). Immunohistological markers for proliferative events, gliogenesis, and neurogenesis within the adult hippocampus. *Cell Tissue Res.* *345*, 1–19.
- von Kugelgen, I. (2006). Pharmacological profiles of cloned mammalian P2Y-receptor subtypes. *Pharmacol. Ther.* *110*, 415–432.
- Ying, Q.L., Stavridis, M., Griffiths, D., Li, M., and Smith, A. (2003). Conversion of embryonic stem cells into neuroectodermal precursors in adherent monoculture. *Nat. Biotechnol.* *21*, 183–186.
- Zimmermann, H. (2011). Purinergic signaling in neural development. *Semin. Cell Dev. Biol.* *22*, 194–204.

**Stem Cell Reports, Volume 6**

**Supplemental Information**

**P2Y<sub>4</sub> Nucleotide Receptor in Neuronal Precursors Induces Glutamatergic Subtype Markers in Their Descendant Neurons**

**Youichi Uda, Shuai Xu, Takafumi Matsumura, and Yoshinori Takei**

## Supplemental Information

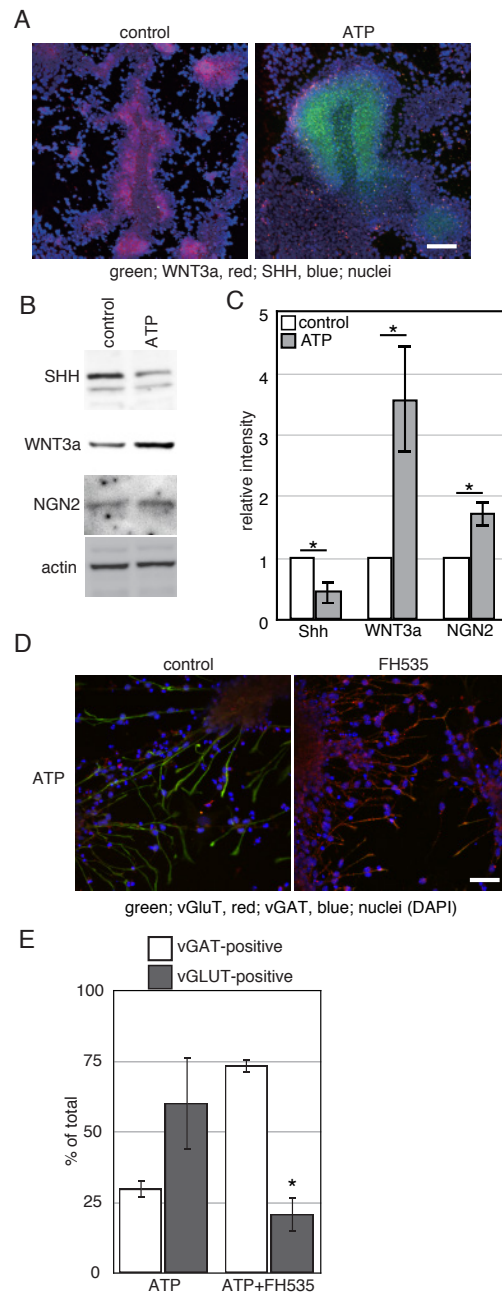

**Figure S1. WNT3a expression in differentiating ES cells after nucleotide treatment, related to Figure 1.**

The mouse ES cell line CGR8 was cultured in a dish coated with gelatine and differentiation was induced by depletion of growth factors. (A) On Day 5 of differentiation, cells were fixed and expression of the indicated proteins was examined. Differentiating mouse ES cells formed a neural tube-like structure, and expression of Shh was detected. However, when ATP was added, cells

forming the neural tube-like structure expressed WNT3a. Bar indicates 50  $\mu\text{m}$ . **(B)** Cells were harvested on Day 5 of differentiation, and cell extracts were prepared. Twenty  $\mu\text{g}$  of protein was analysed by SDS-PAGE and expression of the indicated proteins was examined. **(C)** The intensities of signals in **(B)** were assessed with Image J ver. 1.45n. The graph shows the mean of three independent experiments and the error bars indicate standard error. The intensities of bands in control cells were set at 1. Asterisk indicates  $p < 0.05$  (student t-test). The expression level of SHH was decreased approximately half by the ATP treatment. Reciprocally, the expression of WNT3a was increased 3 times. Expression of a transcription factor neurogenin 2 (NGN2) was also increased after 5 days of ATP treatment. NGN2 is a member of the cascade of transcription factors directing glutamatergic subtype selection of newborn neurons (Berninger et al., 2007; Heinrich et al., 2010; Roybon et al., 2010). **(D)** Differentiation of mouse ES cells was induced for 14 days on gelatine in the presence of 20  $\mu\text{M}$  of the indicated nucleotides, and with or without 10  $\mu\text{M}$  of an WNT/beta-catenin inhibitor FH535. Bar indicates 50  $\mu\text{m}$ . **(E)** Cells positive for vGAT or vGluT in **(D)** were quantified as described in the Materials and Methods. The graph shows the mean of three independent experiments and the error bars indicate standard error. Asterisk indicates  $p < 0.05$ , relative to “ATP” (student t-test). Treatment with an inhibitor of the canonical WNT signalling FH535 blocked the nucleotide-induced vGluT expression. These results indicate that WNT signalling appears to be involved in the pathway of nucleotide-dependent vGluT expression.

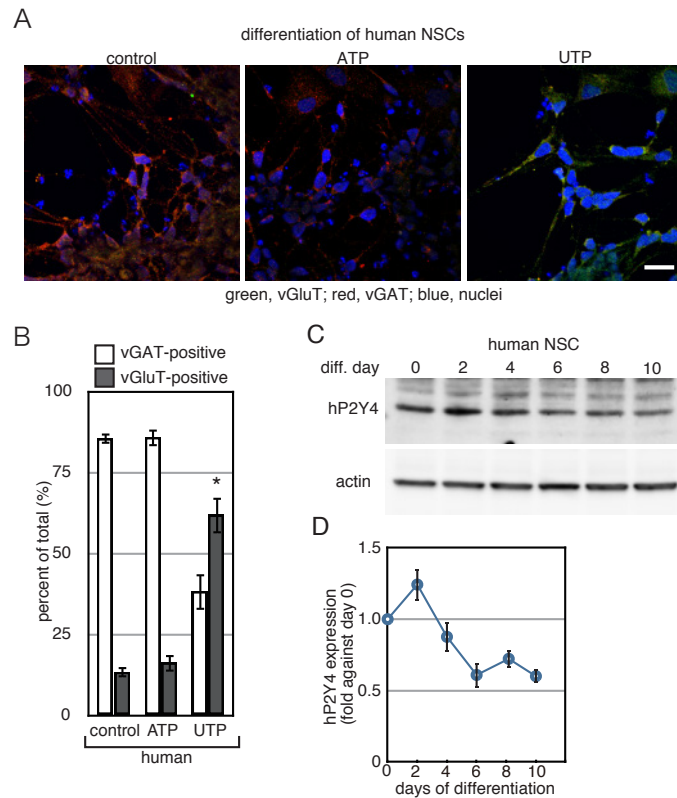

**Figure S2. Effects of nucleotides on the differentiation of human NSCs, related to Figure 2 and 4.**

(A) Differentiation of NSCs derived from human ES cells was induced for 10 days in the presence of 20  $\mu$ M of the indicated nucleotides. Bar indicates 25  $\mu$ m. (B) Cells positive for vGAT or vGluT in (A) were quantified as described in the Experimental Procedures section. The graph shows the mean of three independent experiments and the error bars indicate standard error. Asterisk indicates  $p < 0.05$ , relative to control (student t-test). UTP, but not ATP, induced vGluT expression in cells differentiated from human NSCs, while both UTP and ATP induced vGluT expression in neurons differentiated from mouse ES cells and NSCs (Figure 2A). UTP, but not ATP, can activate human P2Y4, whereas both UTP and ATP can activate mouse P2Y4 (Communi et al., 1995; Nguyen et al., 1995; von Kugelgen, 2006). Human P2Y2, as well as mouse P2Y2, can be activated with both ATP and UTP. (C) Cell extracts were prepared from cells on the indicated differentiation days, and samples (20  $\mu$ g of proteins) were analysed by SDS-PAGE. (D) Intensities of signals in (C) were assessed with Image J ver. 1.45n. The graph shows the mean of three independent experiments and the error bars indicate standard error. Expression of P2Y4 was increased on the

day 2 of differentiation, and then decreased gradually in the neuronal differentiation (Supplemental Figure 2C and D). These results suggest that P2Y4-mediated induction of vGluT is conserved between mouse and human.

## Supplemental Experimental Procedures

### *Antibodies*

Anti-NGN2 antibody (AB3314) was purchased from Millipore. Anti-WNT3a antibody (2721S) was purchased from Cell Signaling. Anti-SHH antibody (MAB464) was purchased from R&D. Anti-human P2Y4 (BS2953) was purchased from Bioworld. Anti-human vGluT (MAB5686) was purchased from Abnova.

### *Human NSC culture and differentiation induction*

Human NSCs derived from the H9 human ES cell line were purchased from Invitrogen. Human NSCs were cultured on dishes coated with polyornitine and laminin, and their differentiation was induced by depletion of FGF2 and EGF according to the manufacturer's recommendation.

## Supplemental references

- Berninger, B., Guillemot, F., and Gotz, M. (2007). Directing neurotransmitter identity of neurones derived from expanded adult neural stem cells. *Eur J Neurosci* 25, 2581-2590.
- Communi, D., Piroton, S., Parmentier, M., and Boeynaems, J. M. (1995). Cloning and functional expression of a human uridine nucleotide receptor. *J Biol Chem* 270, 30849-30852.
- Heinrich, C., Blum, R., Gascon, S., Masserdotti, G., Tripathi, P., Sanchez, R., Tiedt, S., Schroeder, T., Gotz, M., and Berninger, B. (2010). Directing astroglia from the cerebral cortex into subtype specific functional neurons. *PLoS Biol* 8, e1000373.
- Nguyen, T., Erb, L., Weisman, G. A., Marchese, A., Heng, H. H., Garrad, R. C., George, S. R., Turner, J. T., and O'Dowd, B. F. (1995). Cloning, expression, and chromosomal localization of the human uridine nucleotide receptor gene. *J Biol Chem* 270, 30845-30848.
- Roybon, L., Mastracci, T. L., Ribeiro, D., Sussel, L., Brundin, P., and Li, J. Y. (2010). GABAergic differentiation induced by Mash1 is compromised by the bHLH proteins Neurogenin2, NeuroD1, and NeuroD2. *Cereb Cortex* 20, 1234-1244.
- von Kugelgen, I. (2006). Pharmacological profiles of cloned mammalian P2Y-receptor subtypes. *Pharmacol Ther* 110, 415-432.
